# Supplementary material for: Metabarcoding identifies macroalgal composition as a driver of benthic invertebrate assemblages in restored habitats
Source: Springer Nature journal article supplement (doi:10.1038/s41598-025-93327-4), 2025-03-21
Supplement: MOESM3 [file 41598_2025_93327_MOESM3_ESM.pdf]

## Supplementary Information

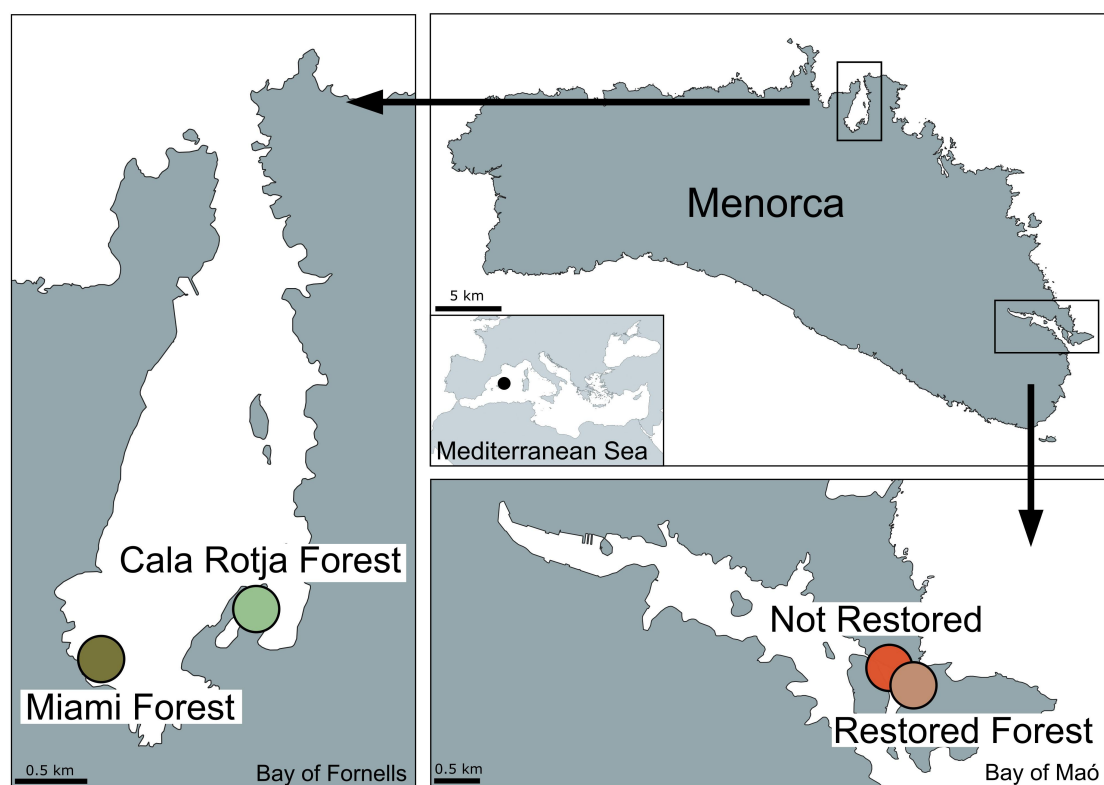

**S Figure 1.** Sampling sites for the four studied assemblages in Menorca Island, NW Mediterranean.

**S Table 1.** Parameter set used for the taxonomic assignment with mkLTG. See Meglécz et al. (2024) for the meaning of each parameter.

| pid | pcov | phit | taxn | seqn | refres  | ltgres  |
|-----|------|------|------|------|---------|---------|
| 100 | 70   | 70   | 1    | 1    | species | species |
| 97  | 70   | 70   | 1    | 1    | species | species |
| 95  | 70   | 70   | 2    | 2    | species | species |
| 90  | 70   | 70   | 3    | 3    | genus   | species |
| 85  | 70   | 70   | 4    | 4    | family  | genus   |
| 80  | 70   | 70   | 4    | 4    | family  | genus   |
| 75  | 70   | 70   | 5    | 5    | order   | family  |
| 70  | 70   | 70   | 5    | 5    | phylum  | order   |

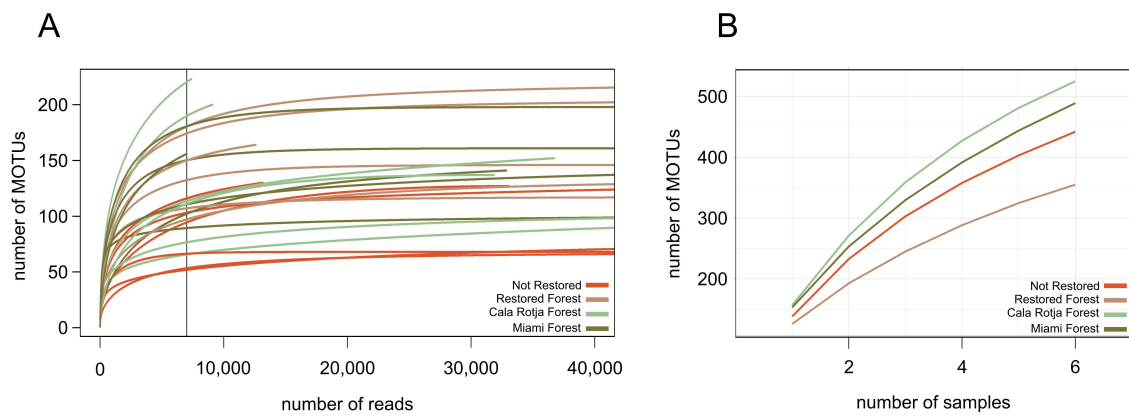

**S Figure 2.** (A) Rarefaction curves of the number of MOTUs at increasing numbers of reads for each sample (the sample with a smaller number of reads contained 7,013 reads), and (B) MOTU accumulation curves at increasing number of samples.

**S Table 2.** Two-way ANOVA summary of (A) MOTUs diversity measured with Shannon-Weiner index, and (B) MOTUs evenness measured with Pielou's index. The asterisk (\*) indicates a significant p-value.

**A) Shannon diversity**

| <b>ANOVA</b>               | <b>Df</b> | <b>Sum Sq</b> | <b>R<sup>2</sup></b> | <b>F value</b> | <b>Pr (&gt;F)</b> |
|----------------------------|-----------|---------------|----------------------|----------------|-------------------|
| <i>assemblage</i>          | 3         | 0.423         | 0.1411               | 0.443          | 0.73              |
| <i>fraction</i>            | 1         | 2.045         | 2.0446               | 6.416          | <b>0.0221*</b>    |
| <i>assemblage:fraction</i> | 3         | 0.239         | 0.0798               | 0.250          | 0.86              |
| residuals                  | 16        | 5.098         | 0.3187               |                |                   |

**B) Pielou's evenness**

| <b>ANOVA</b>               | <b>Df</b> | <b>Sum Sq</b> | <b>R<sup>2</sup></b> | <b>F value</b> | <b>Pr (&gt;F)</b> |
|----------------------------|-----------|---------------|----------------------|----------------|-------------------|
| <i>assemblage</i>          | 3         | 0.015         | 0.0049               | 0.438          | 0.73              |
| <i>fraction</i>            | 1         | 0.065         | 0.0648               | 5.741          | <b>0.0292*</b>    |
| <i>assemblage:fraction</i> | 3         | 0.006         | 0.0020               | 0.175          | 0.91              |
| residuals                  | 16        | 0.181         | 0.0113               |                |                   |

**S Table 3.** (A) PERMANOVA results of the MOTUs composition with *assemblage*, *fraction*, and the interaction between them as fixed factors, using Bray-Curtis distances and 999 permutations. Relative MOTUs read abundance was fourth-root transformed prior to analyses. (B) Pairwise comparisons of *assemblage* factor. P-values of the post hoc test were adjusted with the Bonferroni method. The asterisk (\*) indicates a significant p-value.

| PERMANOVA                  | Df | Sum Sq | R <sup>2</sup> | F value | Pr (>F)       |
|----------------------------|----|--------|----------------|---------|---------------|
| <i>assemblage</i>          | 3  | 2.0019 | 0.2781         | 2.6405  | <b>0.003*</b> |
| <i>fraction</i>            | 1  | 0.5019 | 0.0697         | 1.9862  | <b>0.038*</b> |
| <i>assemblage:fraction</i> | 3  | 0.6503 | 0.0904         | 0.8578  | 0.735         |
| residual                   | 16 | 4.0434 | 0.5618         |         |               |
| total                      | 23 | 7.1976 | 1.0000         |         |               |

| pair-wise ( <i>assemblage</i> )       | Df | Sum Sq | F model | F value | p-value | p-adj         |
|---------------------------------------|----|--------|---------|---------|---------|---------------|
| Not Restored vs. Restored Forest      | 1  | 0.328  | 1.345   | 0.119   | 0.144   | 0.864         |
| Not Restored vs. Cala Rotja Forest    | 1  | 0.872  | 3.382   | 0.253   | 0.004   | <b>0.024*</b> |
| Not Restored vs. Miami Forest         | 1  | 0.552  | 1.936   | 0.162   | 0.053   | 0.318         |
| Restored Forest vs. Cala Rotja Forest | 1  | 1.053  | 4.494   | 0.310   | 0.004   | <b>0.024*</b> |
| Restored Forest vs. Miami Forest      | 1  | 0.598  | 2.286   | 0.186   | 0.036   | 0.216         |
| Cala Rotja Forest vs. Miami Forest    | 1  | 0.600  | 2.176   | 0.179   | 0.031   | 0.186         |
